# Supplementary material for: Direct fabrication of bimetallic AuPt nanobrick spherical nanoarchitectonics for the oxygen reduction reaction
Source: Royal Society of Chemistry journal article supplement (doi:10.1039/c9nj01983a), 2019-01-01
Supplement: c9nj01983a1.pdf [file c9nj01983a1.pdf]

Electronic Supplementary Information for

**Direct fabrication of bimetallic AuPt nanobrick spherical  
nanoarchitectonics for oxygen reduction reaction**

Alam Venugopal Narendra Kumar,<sup>‡</sup> Shuli Yin,<sup>‡</sup> Ziqiang Wang,\* Xiaoqian Qian, Dandan Yang,

You Xu, Xiaonian Li, Hongjing Wang\* and Liang Wang\*

State Key Laboratory Breeding Base of Green-Chemical Synthesis Technology, College of  
Chemical Engineering, Zhejiang University of Technology, Hangzhou 310014, China

\*Corresponding authors' E-mails: zqwang@zjut.edu.cn; hjw@zjut.edu.cn; wangliang@zjut.edu.cn

<sup>‡</sup>A. V. N. Kumar and S. Yin equally contributed to this work.

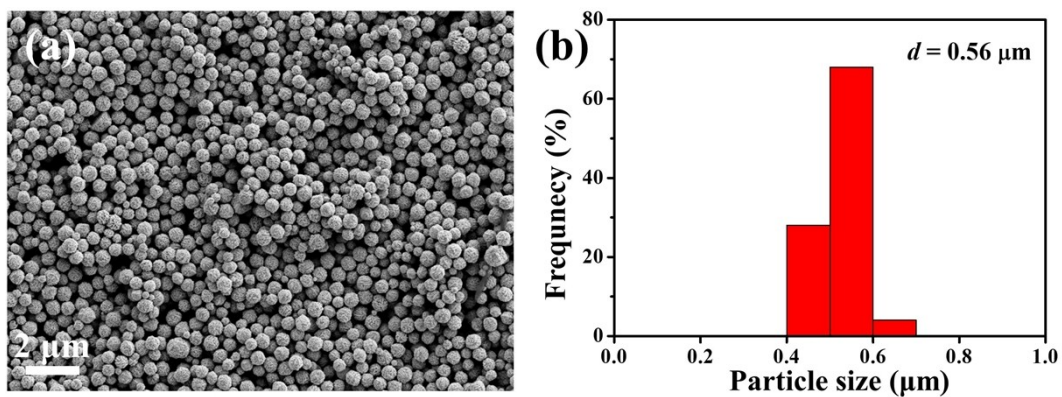

**Fig. S1** (a) Low-magnification SEM image of the AuPt NSNs and (b) corresponding histogram of the particle size distribution.

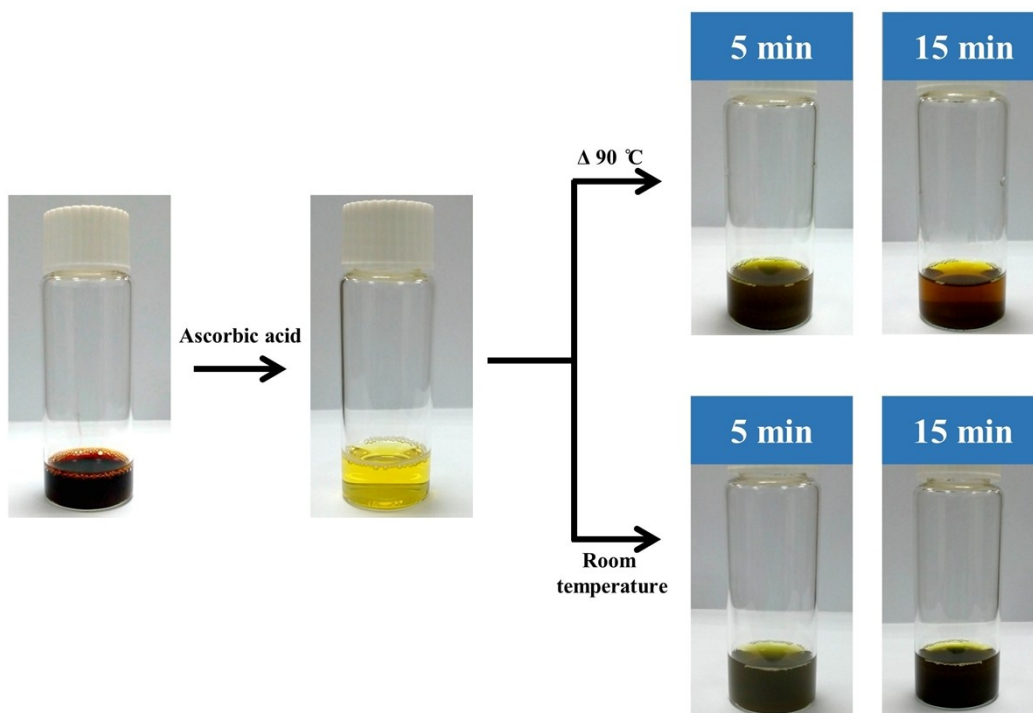

**Fig. S2** Digital photographs of reaction vials for the AuPt NSNs at different time intervals at 90 °C and room temperature.

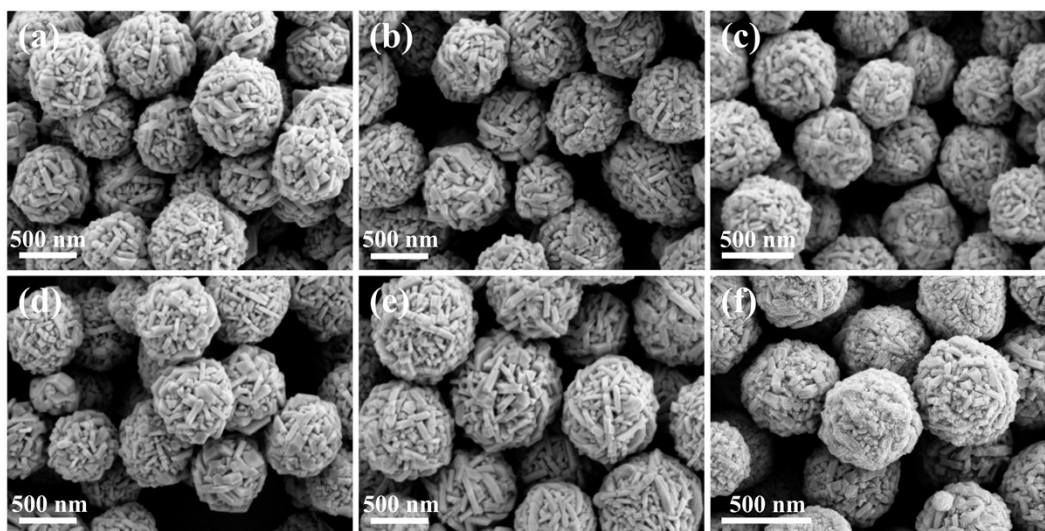

**Fig. S3** SEM images of the AuPt samples prepared at different reaction times: (a) 15 min, (b) 30 min, (c) 2 h, (d) 4 h, (e) 6 h, and (f) 8 h.

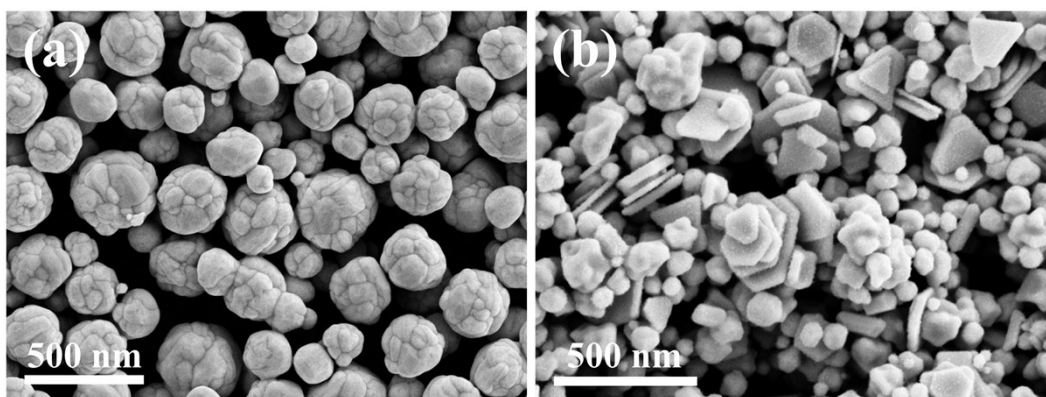

**Fig. S4** SEM images of the samples prepared without (a) Pt precursor and (b) KI under the identical synthesis conditions.

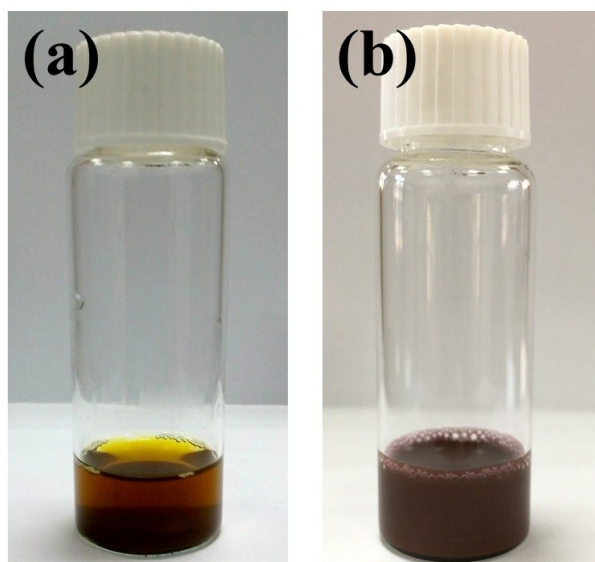

**Fig. S5** Digital photographs of the solutions prepared with the presence of KI (a) and the absence of KI (b).

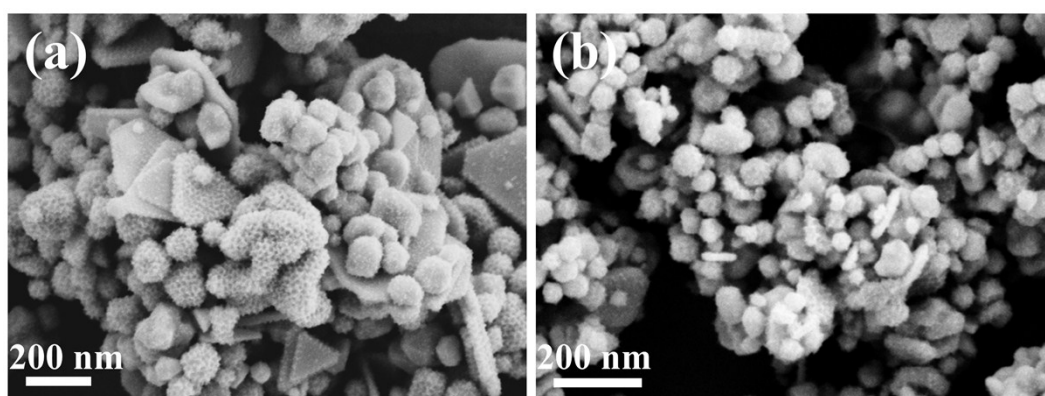

**Fig. S6** SEM images of samples prepared with (a) KBr and (b) KCl under the identical synthesis conditions.

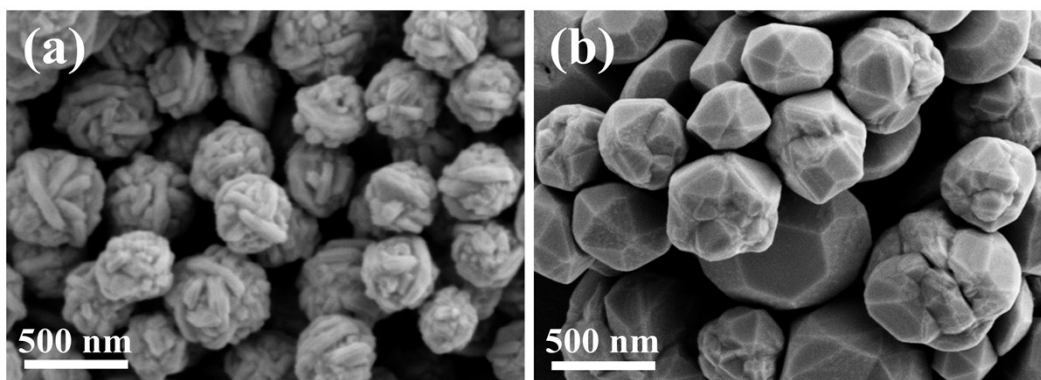

**Fig. S7** SEM images of the samples prepared with (a) Brij 58 and (b) PVP under identical synthesis conditions.

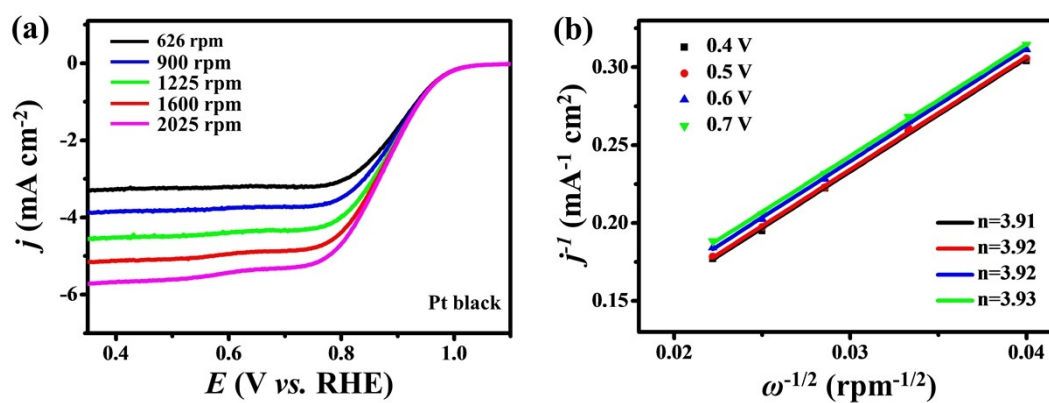

**Fig. S8** (a) ORR polarization curves of Pt black at different rotating speeds. (b) The electron transfer numbers of Pt black at different potentials.
